# Supplementary material
Source: PubMed Central journal article supplement (PMC4541143)

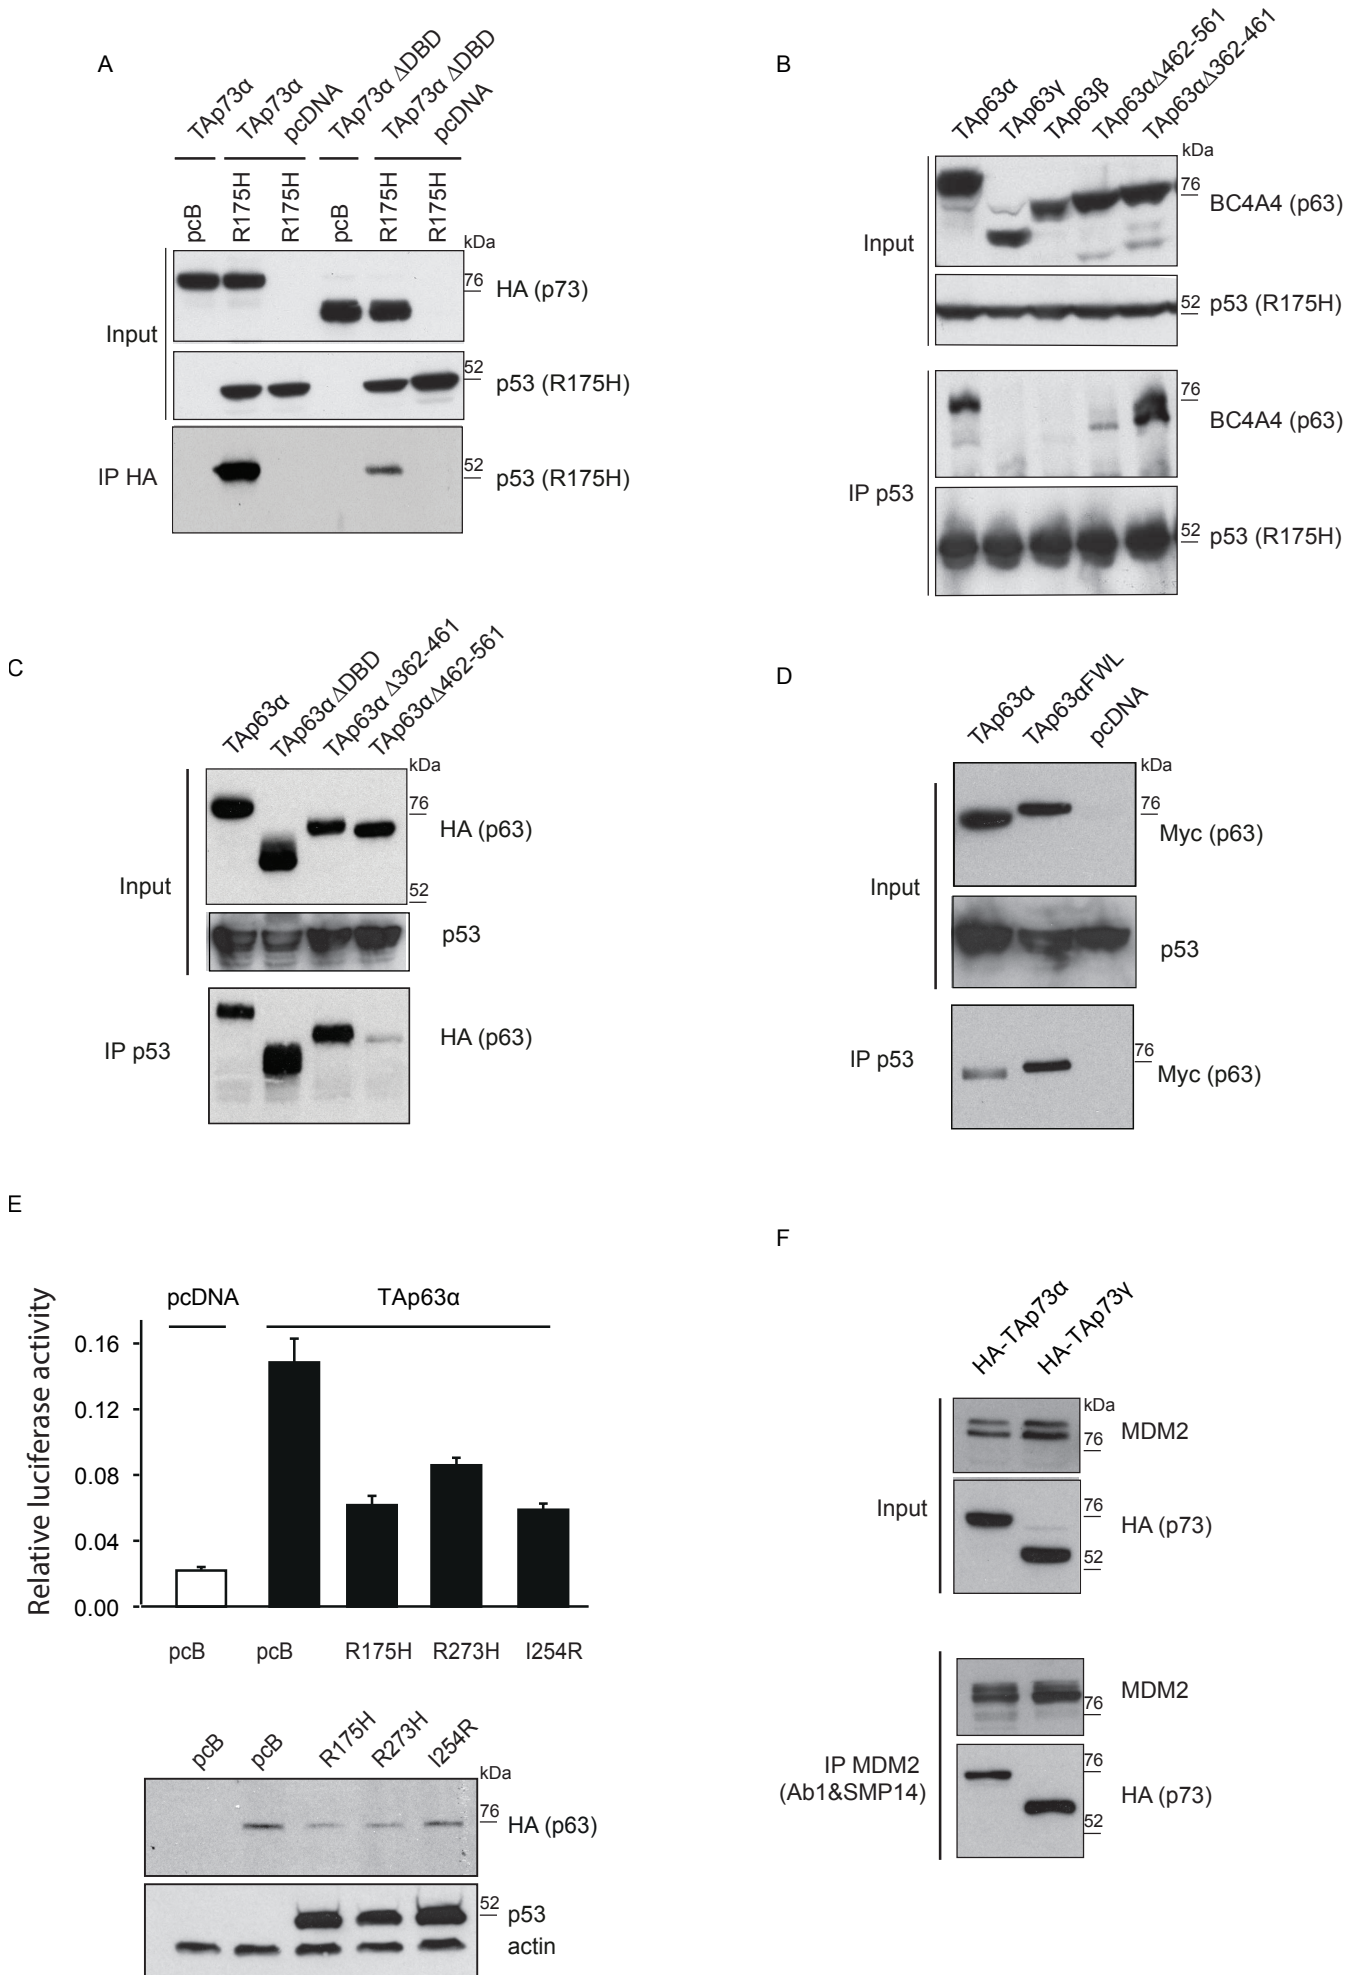

Supplement: onc2014359x1.pdf [file onc2014359x1.pdf]

A

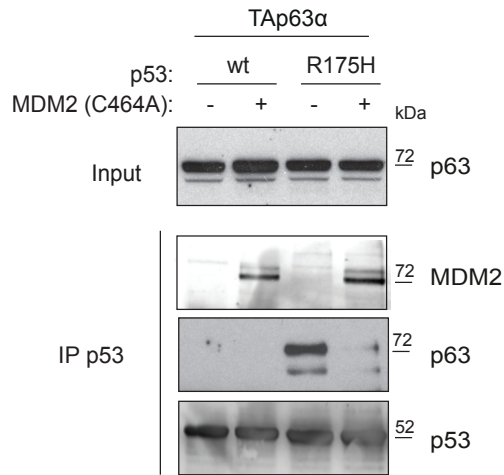

B

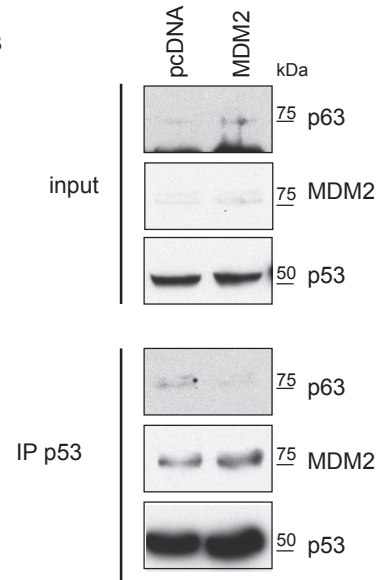

C

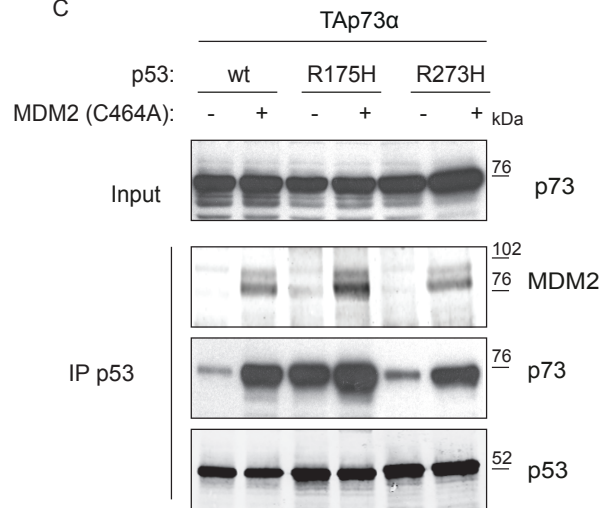

D

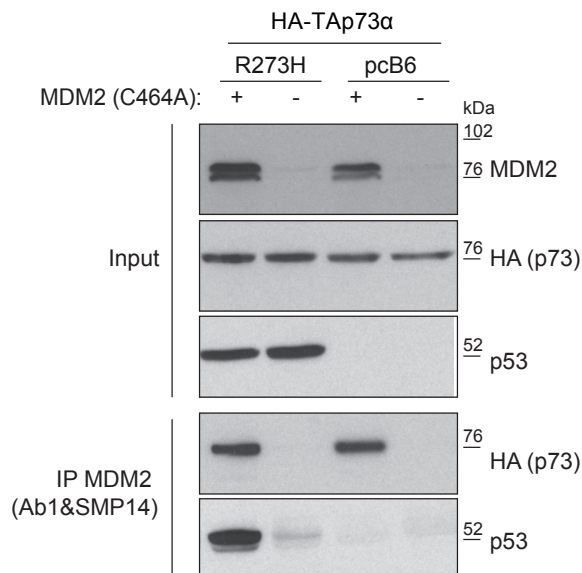

E

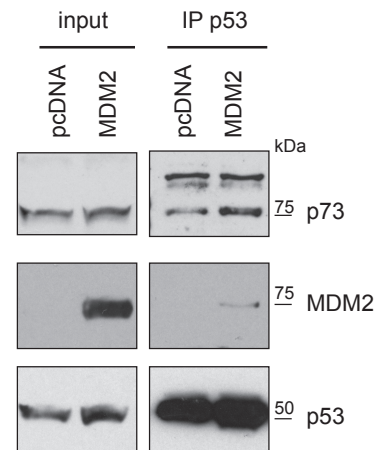

Supplement: onc2014359x2.pdf [file onc2014359x2.pdf]

A

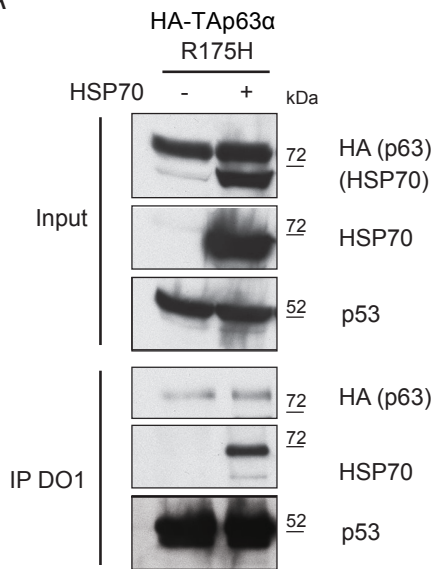

B

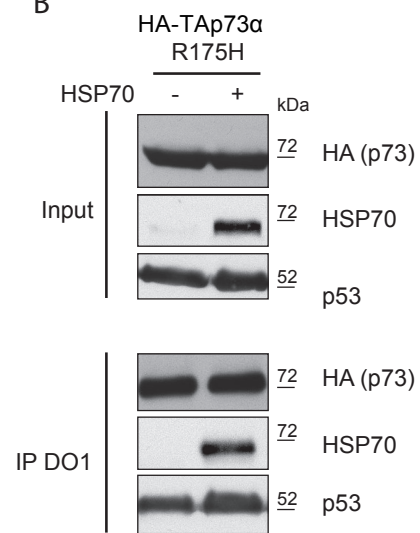

C

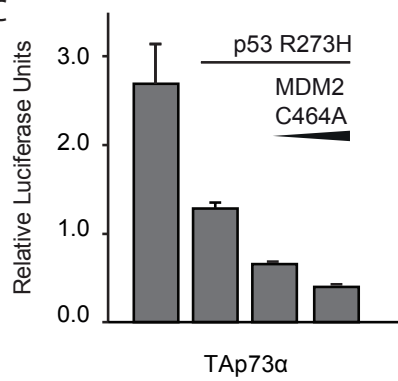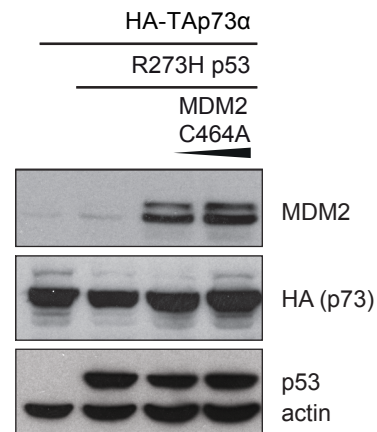

Supplement: onc2014359x3.pdf [file onc2014359x3.pdf]
